# Supplementary material for: Multidomain peptide hydrogel adjuvants elicit strong bias towards humoral immunity
Source: Royal Society of Chemistry journal article supplement (doi:10.1039/d2bm01242a), 2022-01-01
Supplement: d2bm01242a1.pdf [file d2bm01242a1.pdf]

## Supplementary Information: Multidomain Peptide Hydrogel Adjuvants Elicit Strong Bias Towards Humoral Immunity

Brett H. Pogostin,<sup>a</sup> Marina H. Yu,<sup>a</sup> Alon R. Azares,<sup>b</sup> Erin M. Euliano,<sup>a</sup> Cheuk Sun Edwin Lai,<sup>a</sup>  
Gabriel Saenz,<sup>c</sup> Samuel X. Wu,<sup>a</sup> Adam C. Farsheed,<sup>a</sup> Sarah M. Melhorn,<sup>a</sup> Tyler P. Graf,<sup>a</sup> Darren G.  
Woodside,<sup>b</sup> Jeffrey D. Hartgerink,<sup>ac</sup> and Kevin J. McHugh<sup>\*a</sup>

\*Corresponding Author

<sup>a</sup>Department of Bioengineering, Rice University, Houston, TX, 77005, USA

Email: [kevin.mchugh@rice.edu](mailto:kevin.mchugh@rice.edu)

Tel: +1 (713) 348-8089

<sup>b</sup>Molecular Cardiology Research Laboratories, Texas Heart Institute, Houston TX, 77030, USA

<sup>c</sup>Department of Chemistry, Rice University, Houston, TX, 77005, USA

### Contents:

|                                                                                          |      |
|------------------------------------------------------------------------------------------|------|
| Figure S1: K <sub>2</sub> MALDI MS and UPLC                                              | SI-2 |
| Figure S2: R <sub>2</sub> MALDI MS and UPLC                                              | SI-2 |
| Figure S3: E <sub>2</sub> MALDI MS and UPLC                                              | SI-3 |
| Figure S4: Custom 3D-printed 48-well plate for in vitro release assays                   | SI-3 |
| Table S1: Flow cytometry antibodies                                                      | SI-4 |
| Figure S5: OVA MDP hydrogel loading efficiency                                           | SI-4 |
| Figure S6: Flow cytometry manual gating strategy                                         | SI-5 |
| Table S2: ELISA secondary antibodies                                                     | SI-5 |
| Figure S7: Frequency sweeps on OVA loaded MDP hydrogels                                  | SI-6 |
| Figure S8: Activated CD8 <sup>+</sup> T cells and CD4 <sup>+</sup> helper T cell subsets | SI-6 |
| Figure S9: Caspase-3 staining of OVA and E <sub>2</sub>                                  | SI-7 |

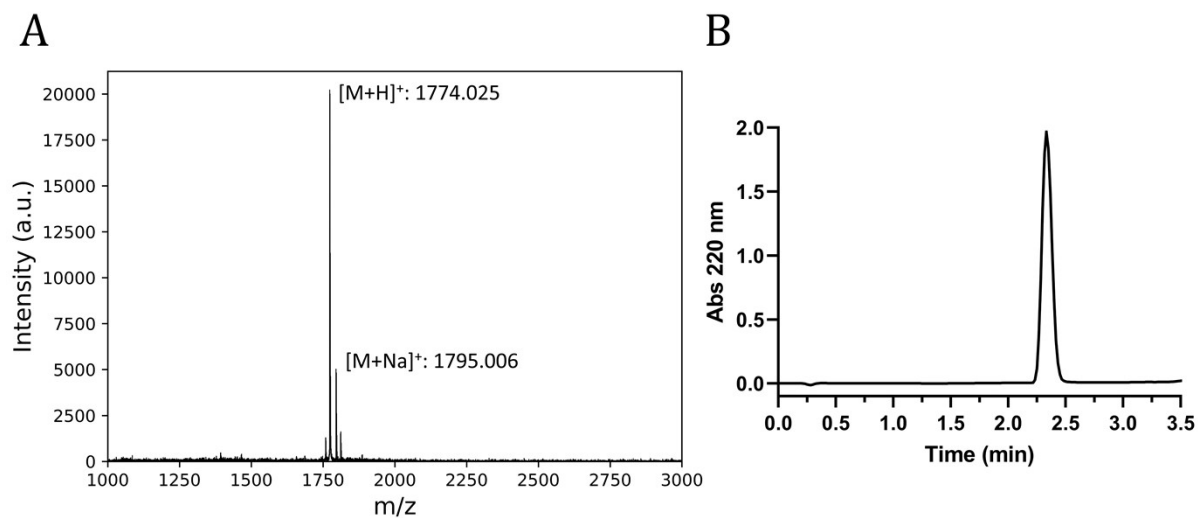

**Figure S1.** A) MALDI MS positive ionization of HPLC-purified K<sub>2</sub> observed  $[M+H]^+$ : 1774.025, expected  $[M+H]^+$ : 1774.29. B) UPLC trace of peptide. The presence of a single peak confirms purity.

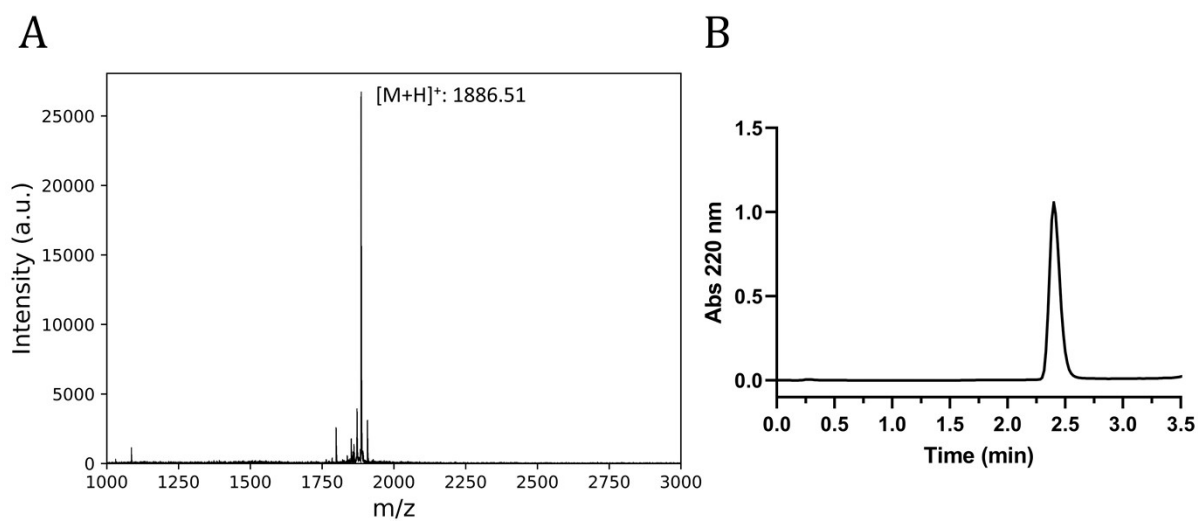

**Figure S2.** A) MALDI MS positive ionization of HPLC-purified R<sub>2</sub> observed  $[M+H]^+$ : 1886.51, expected  $[M+H]^+$ : 1886.33. B) UPLC trace of peptide. The presence of a single peak confirms purity.

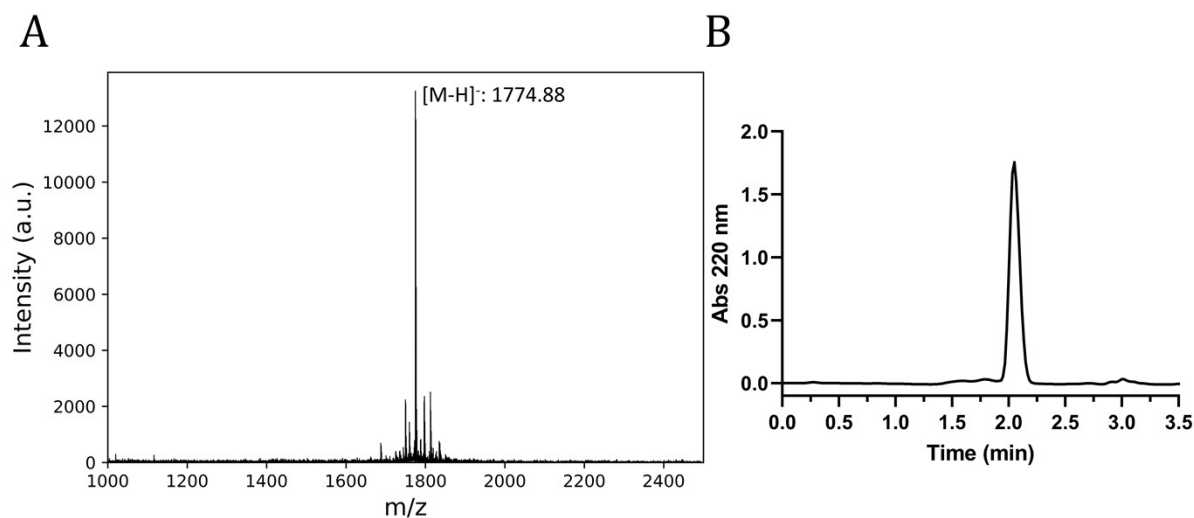

**Figure S3.** A) MALDI MS negative ionization of HPLC-purified E<sub>2</sub> observed [M+H]<sup>+</sup>: 1774.88, expected [M+H]<sup>+</sup>: 1774.90. B) UPLC trace of peptide. The presence of a single peak confirms purity.

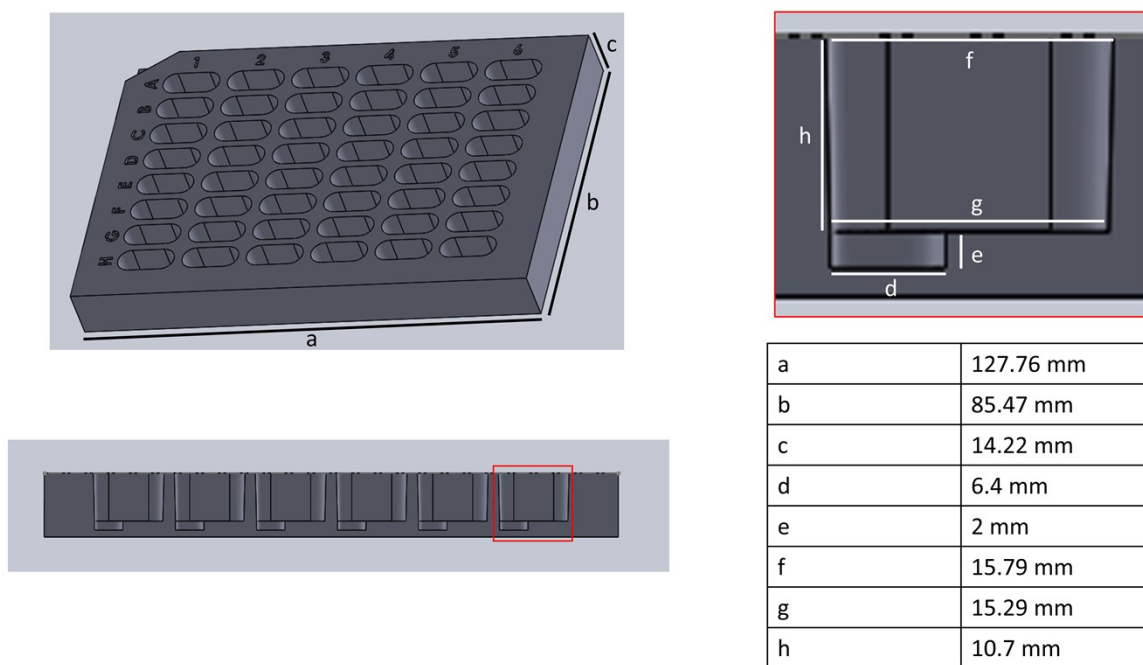

**Figure S4.** Schematic of the custom 3D-printed microplate used in the *in vitro* release studies with corresponding dimensions. The gels were plated in divot on the left side of the well and fluorescence measurements were taken from the right side to isolate material that has been released from the gels.

**Table S1.** Flow cytometry antibodies, volume, excitation lasers, and bandpass filters used in the current study.

| Antibody          | Fluorophore     | BioLegend Catalog #     | Dilution for 1 Million Splenocytes | Excitation Laser (nm) | Bandpass Filter/Bandwidth (nm) |
|-------------------|-----------------|-------------------------|------------------------------------|-----------------------|--------------------------------|
| CD45              | BV421           | 103133                  | 1 $\mu$ L                          | 405                   | 450/50                         |
| CD4               | PerCP-Cy5.5     | 100539                  | 0.5 $\mu$ L                        | 488                   | 695/40                         |
| CD8a              | APC-Fire 750    | 100765                  | 0.5 $\mu$ L                        | 633                   | 780/60                         |
| CD3e              | Alexa Fluor 700 | 100216                  | 1 $\mu$ L                          | 633                   | 695/40                         |
| CD86              | PE/Cy7          | 105013                  | 1 $\mu$ L                          | 561                   | 780/60                         |
| CXCR4             | BV421           | 146511                  | 1 $\mu$ L                          | 405                   | 450/50                         |
| CCR6              | BV605           | 129819                  | 2.5 $\mu$ L                        | 405                   | 610/20                         |
| CXCR3             | PE              | 155903                  | 2.5 $\mu$ L                        | 561                   | 582/15                         |
| CCR4              | APC             | 131211                  | 5 $\mu$ L                          | 633                   | 660/20                         |
| PD-1              | BV785           | 135225                  | 0.75 $\mu$ L                       | 405                   | 780/60                         |
| SIINFEKL Tetramer | APC             | N/A (NIH Tetramer Core) | 0.15 $\mu$ g                       | 633                   | 660/20                         |

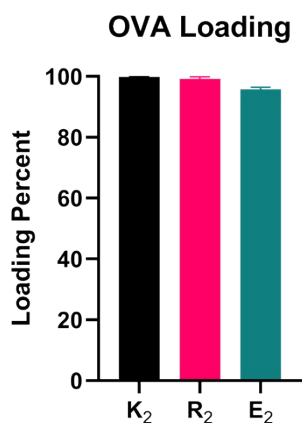

**Figure S5.** OVA loading efficiency into MDP hydrogels as calculated from the first time point from the in vitro release assay.

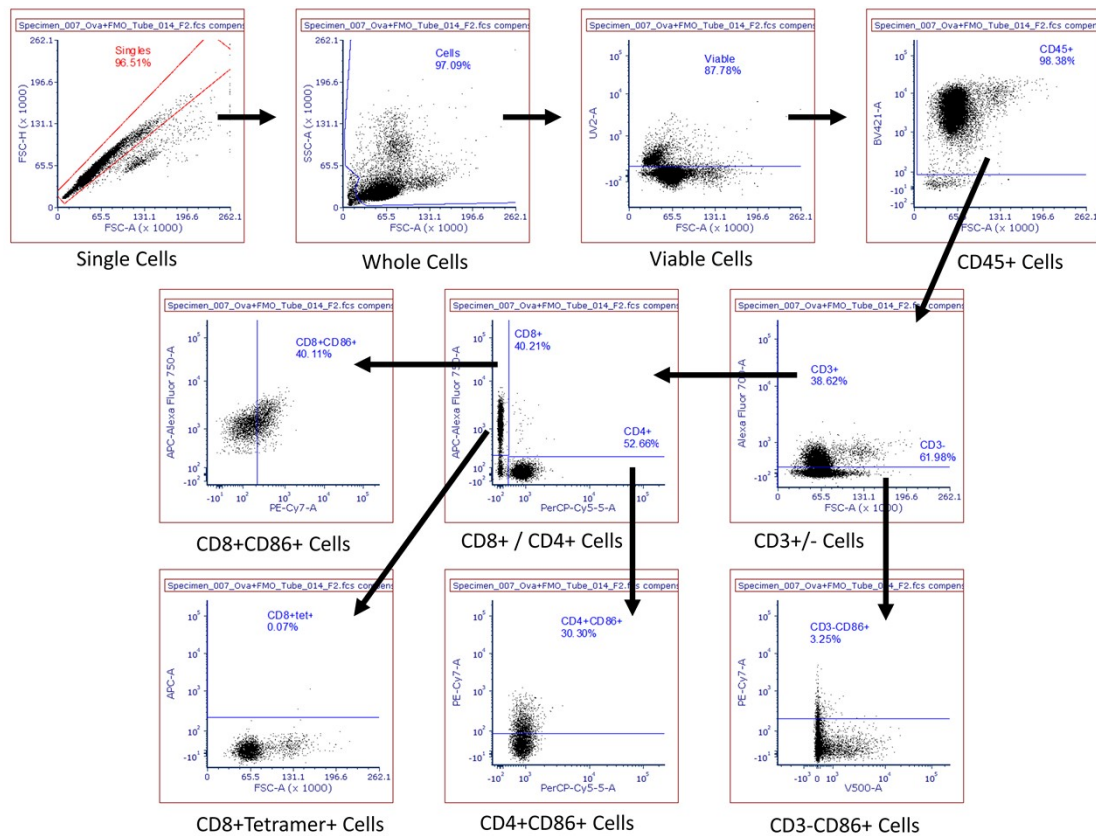

**Figure S6.** Flow cytometry gating strategy on a representative sample.

**Table S2.** HRP-conjugated secondary antibodies used for ELISA-based titer quantification via ELISA.

| Antibody              | Supplier (Catalog #)                 | Concentration used |
|-----------------------|--------------------------------------|--------------------|
| Rabbit anti-mouse IgG | Jackson ImmunoResearch (315-035-045) | 0.8 µg/mL          |
| Goat anti-mouse IgG2c | Novus Biologicals (NB7566)           | 0.1 µg/mL          |
| Goat anti-mouse IgM   | Novus Biologicals (NB7497)           | 0.1 µg/mL          |

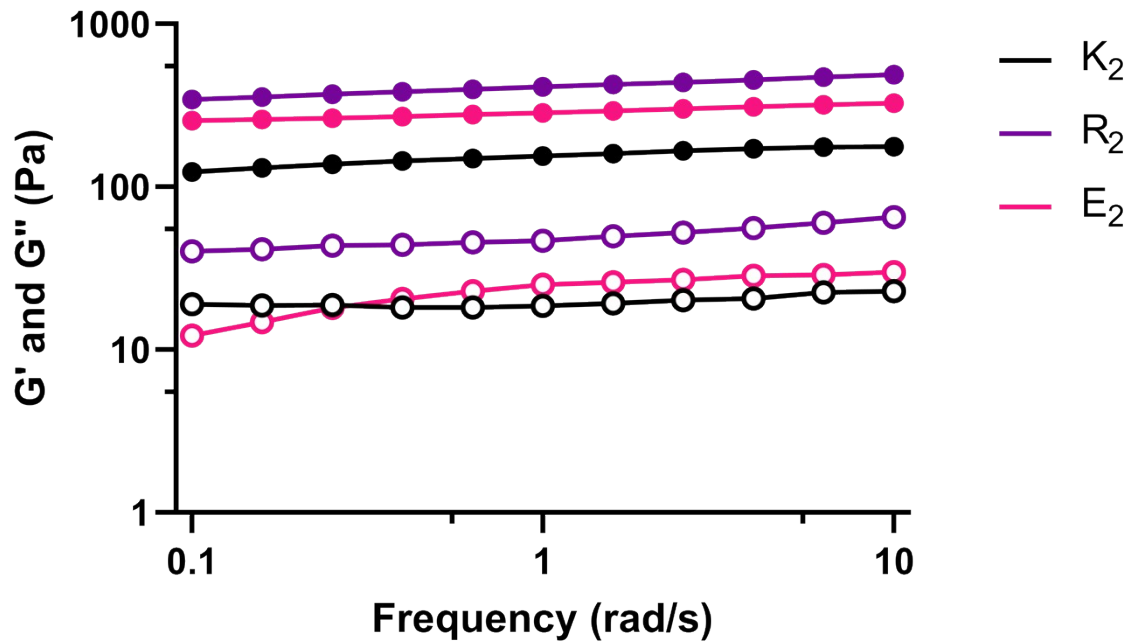

**Figure S7.** Frequency sweeps from 0.1-10 rad/s on a representative sample of each of the three MDP hydrogels loaded with 0.2 mg/mL OVA. Filled symbols represent  $G'$  and empty symbols represent  $G''$  values.

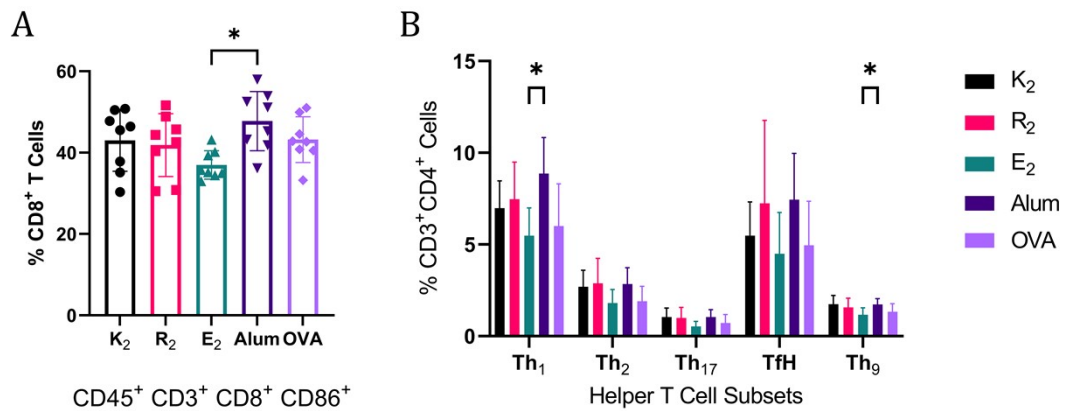

**Figure S8.** A) Percentage of activated CD8<sup>+</sup> CD86<sup>+</sup> in the total splenocyte CD8 T cell population in vaccinated mice (n=8). B) Helper T cell subsets characterized from the spleens of vaccinated mice (n=7-8) as a percent of the total CD3<sup>+</sup> CD4<sup>+</sup> helper T cell population. There were no significant differences between adjuvanted and unadjuvanted vaccine groups in the populations of Th<sub>1</sub> (CXCR3<sup>+</sup> CCR4<sup>-</sup>), Th<sub>2</sub> (CXCR4<sup>+</sup> CCR4<sup>+</sup>), Th<sub>17</sub> (CCR4<sup>+</sup> CCR6<sup>+</sup>), Tfh (CXCR4<sup>+</sup> PD-1<sup>+</sup>), and Th<sub>9</sub> (CCR6<sup>+</sup> CCR4<sup>-</sup>) helper T cells.

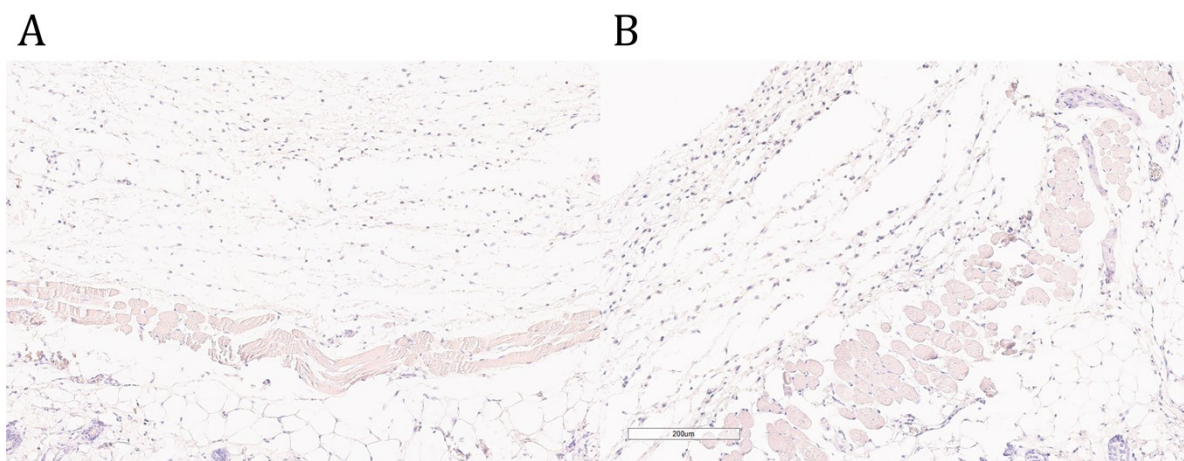

**Figure S9.** Representative caspase-3 staining of C57BL/6J mouse tissue sections 3 days post-injection with A) soluble OVA and B) OVA+E<sub>2</sub> where the scale bar represents 200 μm. Brown indicates the presence of caspase-3 (apoptosis), and blue is a nuclei counterstain.
